# Supplementary material for: Educational needs and barriers in dementia care training for migrant family care assistants in Italy: a qualitative study
Source: Springer Nature journal article supplement (doi:10.1186/s12912-025-03993-y), 2025-10-31
Supplement: MOESM1 [file 12912_2025_3993_MOESM1_ESM.pdf]

# AGE-It

## Aging well in an aging society

Study on the educational need of Migrant family care assistants

Living in Italy

### Semi-structured questionnaire

| Region | Organisation | Interviewer | Interviewee's code | Date | Duration |
|--------|--------------|-------------|--------------------|------|----------|
|        |              |             |                    |      |          |

#### A-SOCIO-DEMOGRAPHIC INFORMATION

- 1) Can I ask you your age?
- 2) In which sex do you recognise yourself?

| <u>Male</u> | <u>Female</u> | <u>Other</u> |
|-------------|---------------|--------------|
| <u>1</u>    | <u>2</u>      | <u>9</u>     |

- 3) Which is your citizenship?
- 4) Which is your marital status?

| Married/in couple | Divorced | Single | Widowed | Other |
|-------------------|----------|--------|---------|-------|
| 1                 | 2        | 3      | 4       | 5     |

- 5) Which country do you come from?
- 6) How much time do you live in Italy?
- 7) What are the reasons that prompted you to move to Italy (push factors)?
- 8) In which city are you living now?
- 9) Who do you live with?

| Alone | With my spouse/partner | With spouse/partner and children | With other family members | With other people (no relatives) | With the older person I care for | With the older person and other relatives |
|-------|------------------------|----------------------------------|---------------------------|----------------------------------|----------------------------------|-------------------------------------------|
| 1     | 2                      | 3                                | 4                         | 5                                | 6                                | 7                                         |

10) If you live with the assisted older person, can you describe his/her family please?

11) If you live with the assisted older person, can you describe what living together is like?

### **B-BIRTH COUNTRY AND EDUCATION**

12) When you left your country of origin, how was your household constituted? You lived:

|                                              |    |
|----------------------------------------------|----|
| alone                                        | 1  |
| With my mother                               | 2  |
| With my father                               | 3  |
| With my parents                              | 4  |
| With my my father in law                     | 5  |
| With my mother in law                        | 6  |
| With my parents in law                       | 7  |
| With my spouse/partner                       | 8  |
| With my spouse/partner and my children       | 9  |
| With my spouse/partner and my parents        | 10 |
| With my spouse/partner and my parents in law | 11 |
| With my children(s)                          | 12 |
| With my sister                               | 13 |
| With my brother                              | 14 |
| Other (specify: _____ )                      | 15 |

13) Which is your educational degree?

|                          |   |
|--------------------------|---|
| None: I have not studied | 0 |
| Primary school           | 1 |
| Secondary school         | 2 |
| High school              | 3 |
| Bachelor degree          | 4 |
| Master degree            | 5 |
| PhD                      | 6 |
| Other (specify: _____ )  | 9 |

14) Did you acquire your qualification in your country of origin/province?

|     |     |
|-----|-----|
| No* | Yes |
| 0   | 1   |

**\*IF NO, GO TO SECTION C – WORKING CONDITION IN THE BIRTH COUNTRY**

15) If yes, when you moved to Italy did you bring your certificate/certificate with you?

|    |     |
|----|-----|
| No | Yes |
| 0  | 1   |

16) Is your education certificate recognised in Italy? Can you use it here?

|    |     |              |
|----|-----|--------------|
| No | Yes | I don't know |
| 0  | 1   | 2            |

17) Has it been recognised by the Italian Authority?

|    |     |              |
|----|-----|--------------|
| No | Yes | I don't know |
| 0  | 1   | 2            |

18) If your certificate has been recognised, which kind of equivalence has received?

19) If not, which were the reasons of the lack of recognising/equivalence?

### **C- WORKING CONDITION IN THE BIRTH COUNTRY**

20) Which kind of work did you do in your birth country?

21) Would you like to live in Italy for ever?

22) If yes, what do you think your future in Italy might be like from a work point of view? [How do you see yourself in one year? As in five?]

### **D-LIVING AND WORKING CONDITION IN ITALY**

23) How long have you been working as a family care assistant? Specify months/years.

24) Which activities do you carry out in your work daily?

25) Do you deal with daily household economic management?

|    |     |
|----|-----|
| No | Yes |
| 0  | 1   |

26) Do you manage the older person's money?

|    |     |
|----|-----|
| No | Yes |
| 0  | 1   |

27) What activities do you perform for the elderly person you assist? It is also possible to refer several activities.

|                                                                                                                                |    |
|--------------------------------------------------------------------------------------------------------------------------------|----|
| Personal hygiene (eg bath or shower)                                                                                           | 1  |
| Meals preparation                                                                                                              | 2  |
| Dressing the older person                                                                                                      | 3  |
| Feeding the older person                                                                                                       | 4  |
| Accompany the older persons to the medical visits                                                                              | 5  |
| Carrying out recreational and stimulating activities (reading the newspaper, singing, listening to music, playing cards, etc.) | 6  |
| Medicines administration                                                                                                       | 7  |
| Cleaning the house                                                                                                             | 8  |
| Doing laundry                                                                                                                  | 9  |
| Other                                                                                                                          | 10 |

28) Can you describe your typical daily routine?

29) How many hours do you work per week?

30) Have you got free time?

|    |     |
|----|-----|
| No | Yes |
| 0  | 1   |

31) If yes, how much a week?

32) Who do you spend your free time with??

33) Who do you spend your daily activities with (eating, sleeping, shopping)?

34) Have you never thought about changing job?

|    |     |
|----|-----|
| No | Yes |
| 0  | 1   |

35) Why?

36) What difficulties do you encounter during your work? Could you recount an episode in which you encountered difficulties?

37) If you plan to continue working as a carer of a person with dementia, do you think you could acquire different skills over time?

38) If yes, how?

39) If yes, which ones?

## E- EDUCATIONAL NEEDS

40) The skills acquired in your country of origin enabled you to find work in Italy?

|    |     |
|----|-----|
| No | Yes |
| 0  | 1   |

41) If yes, please tell me more.

42) Have you ever attended a course on elder care?

|    |     |
|----|-----|
| No | Yes |
| 0  | 1   |

43) Sif yes, please describe the contents of the course (eg the lessons) and where it was (e.g. in Italy or in the origin country)

44) Have you ever participated in a training course for the care and nursing of older people with dementia?

|    |     |
|----|-----|
| No | Yes |
| 0  | 1   |

45) If yes, can you describe its contents please?

46) Would you like to attend training courses for the care and assistance of dementia patients?

|    |     |
|----|-----|
| No | Yes |
| 0  | 1   |

47) Do you think that such a course may be useful in your work?

|    |     |
|----|-----|
| No | Yes |
| 0  | 1   |

48) Why?

49) If yes, what would you like to learn make your work better?

50) Which would be the best way to attend such a course?

|          |            |        |        |
|----------|------------|--------|--------|
| Computer | Smartphone | Tablet | Other* |
| 0        | 1          | 2      | 3      |

\*Specify

51) Do you think it would be useful to download and print the lessons?

### F-NETWORK ACCESSIBILITY

52) Do you regularly surf the internet?

|    |     |
|----|-----|
| No | Yes |
| 0  | 1   |

53) Which device do you use most?

|          |            |        |        |
|----------|------------|--------|--------|
| Computer | Smartphone | Tablet | Other* |
| 0        | 1          | 2      | 3      |

\*Specify

54) How do you stay in contact with your relatives in your birth country?

|          |            |        |        |
|----------|------------|--------|--------|
| Computer | Smartphone | Tablet | Other* |
| 0        | 1          | 2      | 3      |

\*Specify

### G- AGING PROCESS KNOWLEDGE

55) How would you define old age? Could you choose three words?

56) What do you know about dementia ?

57) What do you know about Alzheimer's disease?

58) What is the biggest difference you notice in the way elderly people are cared for between your home country and Italy?

### H-MANAGEMENT OF A PERSON LIVING WITH DEMENTIA

59) How do you deal with elderly carers when they have hallucinations, or when they behave aggressively, or when they wander aimlessly?

60) How often do you understand the needs of the person with dementia?

|       |        |           |       |        |
|-------|--------|-----------|-------|--------|
| 1     | 2      | 3         | 4     | 5      |
| Never | Rarely | Sometimes | Often | Always |

61) When you are in difficulty because you do not understand the needs of the person you assist, whom do you ask for help?

## I-RELATIONSHIP WITH INFORMAL (FAMILY) AND FORMAL (PROFESSIONAL) CAREGIVERS

62) Can you tell me more about the relationship you have with the relatives of the older person you are caring for?

63) How much satisfied are you with the relationship you have with the relatives of the older person you care for?

|        |     |       |      |           |
|--------|-----|-------|------|-----------|
| At all | Few | Quite | Much | Very much |
| 0      | 1   | 2     | 3    | 4         |

64) Why?

65) How much satisfied are you with the relationship you have with general practitioners, doctors and nurses you are in contact with?

|        |     |       |      |           |
|--------|-----|-------|------|-----------|
| At all | Few | Quite | Much | Very much |
| 0      | 1   | 2     | 3    | 4         |

66) Why?

67) Do the older person's relatives help and support you in caring? And how?

68) Do the general practitioner and the healthcare care professionals (eg nurses) support you in caring? And how?

69) In the following vignettes, a hypothetical relationship with an older person is depicted. On a scale of 1 to 10 where do you place yourself? Place a mark on the number that best represents your thoughts.

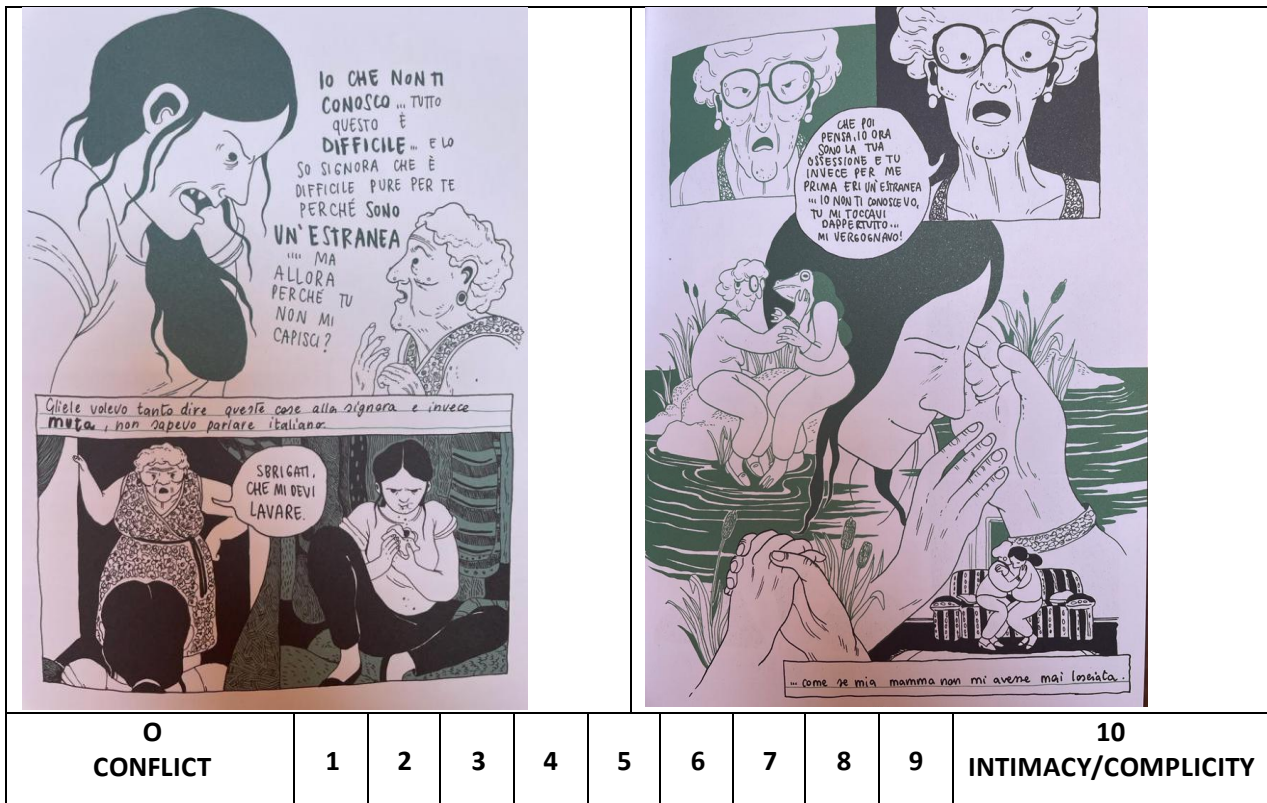

NOTE: The vignettes have been taken from “Sindrome Italia. Storia delle nostre badanti”, Tiziana Francesca Vaccaro e Elena Mistrello, Becco Giallo Editor, 2021.

**L-WELL-BEING (WHO-5 ITEMS)**

For each of the five statements, please indicate the answer that comes closest to how you have felt over the past two weeks. Higher numbers correspond to a greater state of well-being.  
 Example: If you have felt cheerful and in a good mood more than half of the time in the last two weeks, please tick the box with the number 3.

|          | <i>In the last two weeks</i>                                      | Always | Most of the time | More than half of the time | Less than half of the time | Sometimes | Never |
|----------|-------------------------------------------------------------------|--------|------------------|----------------------------|----------------------------|-----------|-------|
| <b>1</b> | <b>I have felt cheerful and in good spirits</b>                   | 5      | 4                | 3                          | 2                          | 1         | 0     |
| <b>2</b> | <b>I have felt calm and relaxed</b>                               | 5      | 4                | 3                          | 2                          | 1         | 0     |
| <b>3</b> | <b>I have felt active and vigorous</b>                            | 5      | 4                | 3                          | 2                          | 1         | 0     |
| <b>4</b> | <b>I woke up feeling fresh and rested</b>                         | 5      | 4                | 3                          | 2                          | 1         | 0     |
| <b>5</b> | <b>My daily life has been filled with things that interest me</b> | 5      | 4                | 3                          | 2                          | 1         | 0     |

**Thank you for your time!**
